# Supplementary material for: In situ generated α-Co(OH)2/Co3Mo derived from Co–Mo–N for enhanced electrochemical hydrogen evolution reaction
Source: Royal Society of Chemistry journal article supplement (doi:10.1039/d4ta04274c), 2024-01-01
Supplement: d4ta04274c1.pdf [file d4ta04274c1.pdf]

**In-situ Generated  $\alpha$ -Co(OH)<sub>2</sub>/Co<sub>3</sub>Mo derived from Co-Mo-N for  
enhanced electrochemical hydrogen evolution reaction**

Pengfei Zhou<sup>a,b\*</sup>, Xuncheng Liu<sup>a</sup>, Xiang Ge<sup>a</sup>, Jinxian Feng<sup>c\*</sup>

<sup>a</sup>College of Materials and Metallurgy, Guizhou University, Guiyang 550025, PR China

<sup>b</sup>Key Laboratory of Advanced Manufacturing Technology, Ministry of Education,  
Guizhou University, Guiyang 550025, PR China

<sup>c</sup>Institute of Applied Physics and Materials Engineering, University of Macau, 999078,  
Macao SAR

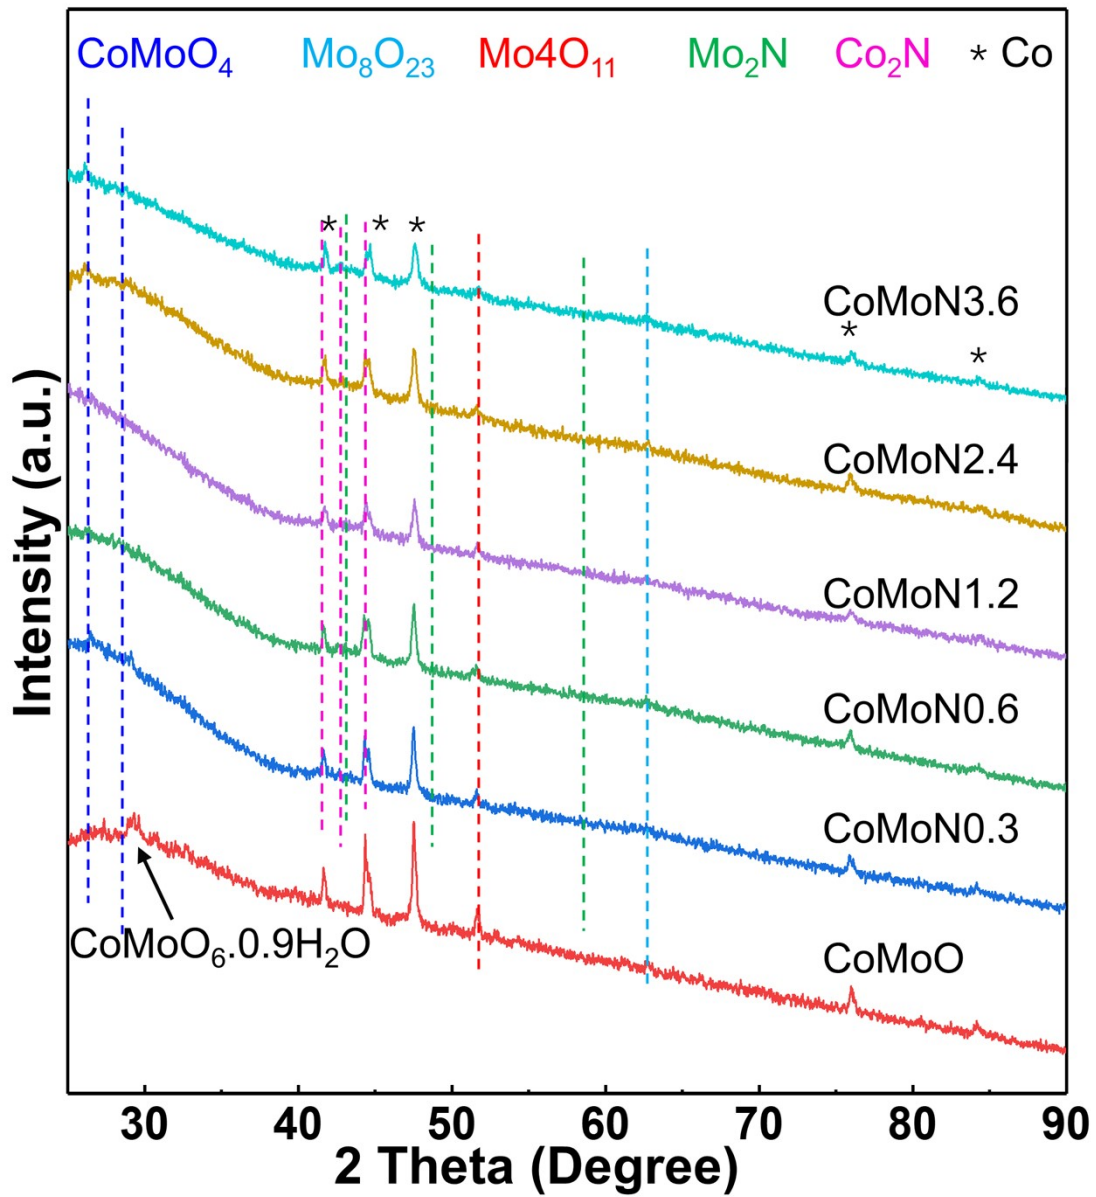

**Figure S1.** XRD of the CoMoO precursor and samples treated under different N content.

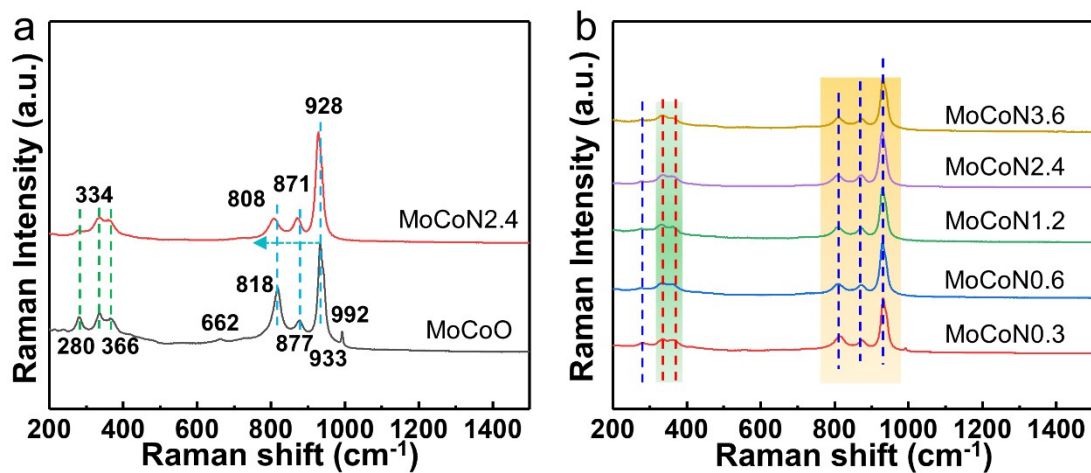

**Figure S2.** Raman spectra of the CoMoO precursor and CoMoN with different N content.

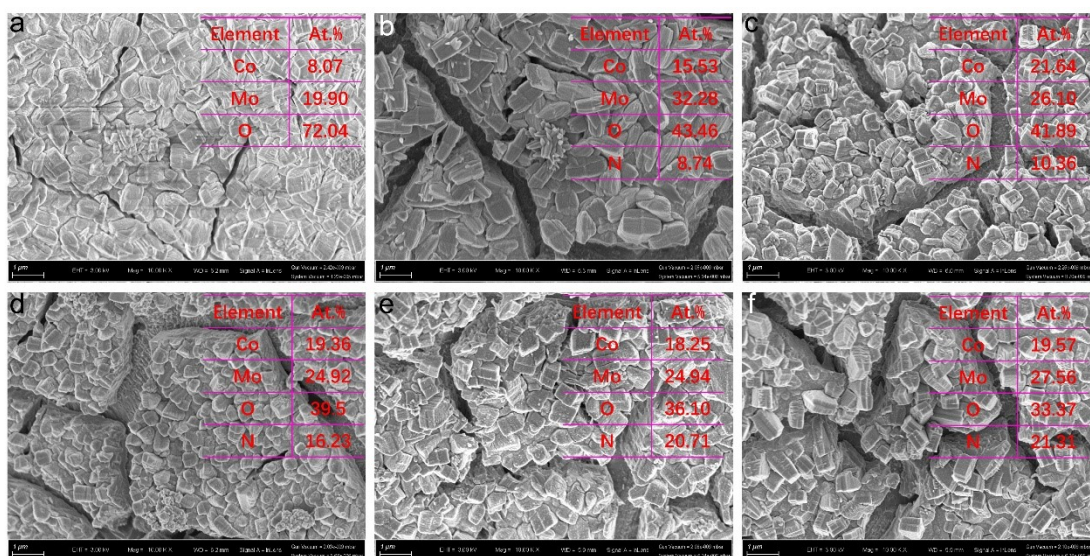

**Figure S3.** SEM and EDS of the catalysts. (a) CoMoO precursor, (b) CoMoN0.3, (c) CoMoN0.6, (d) CoMoN1.2, (e) CoMoN2.4, (f) CoMoN3.6.

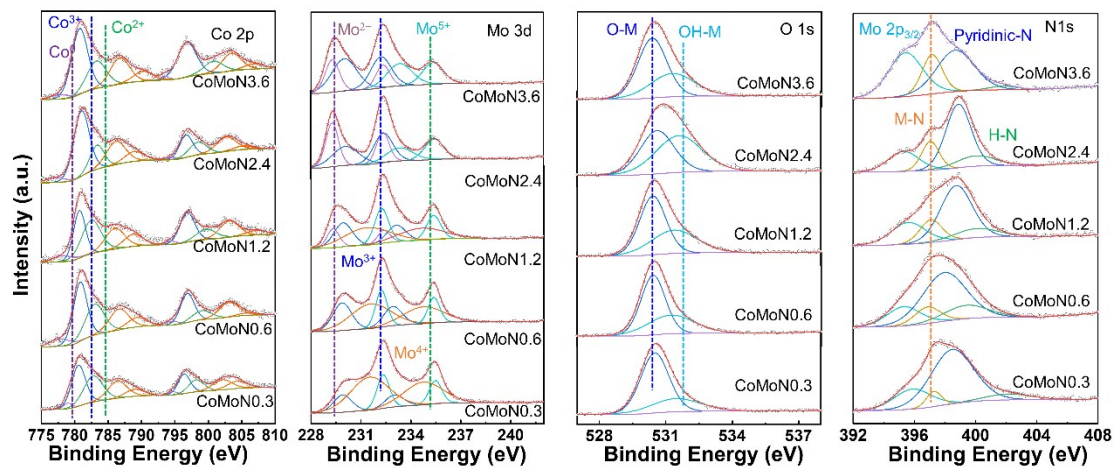

**Figure S4.** High-resolution XPS spectra of Co 2p, Mo 3d, O 1s, and N 1s in CoMoN with different N content.

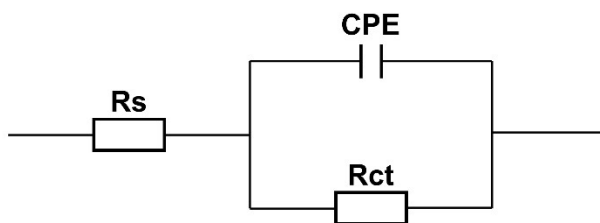

**Figure S5.** The equivalent circuit for the samples.

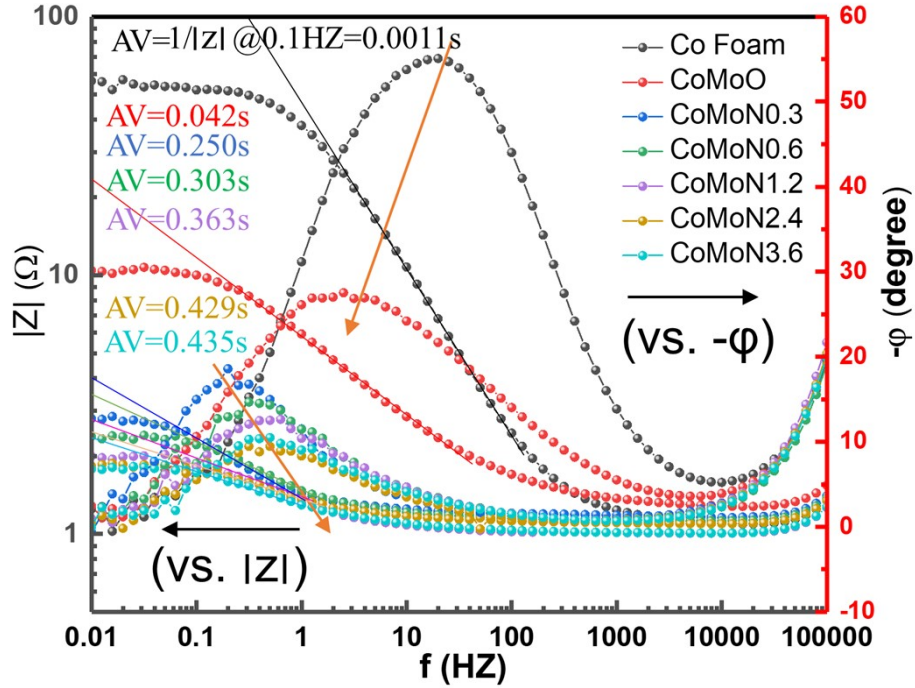

**Figure S6.** The Bode plots of the samples according to Figure 3c.

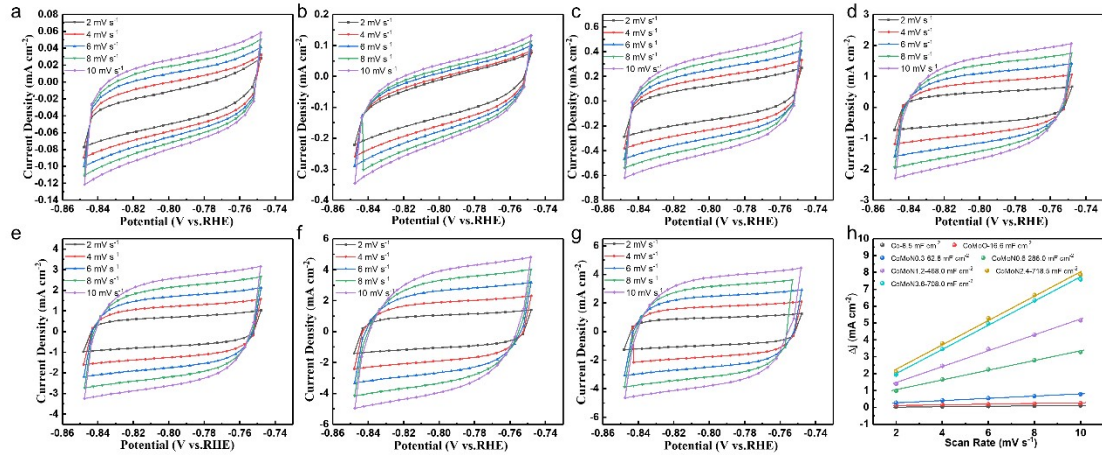

**Figure S7.** CV curves under different scan rates of Co foam (a), CoMoO (b), CoMoN (0.3), CoMoN (0.6), CoMoN (1.2), CoMoN (2.4), and CoMoN (3.6), and the corresponding  $C_{dl}$  calculated from the CV curves.



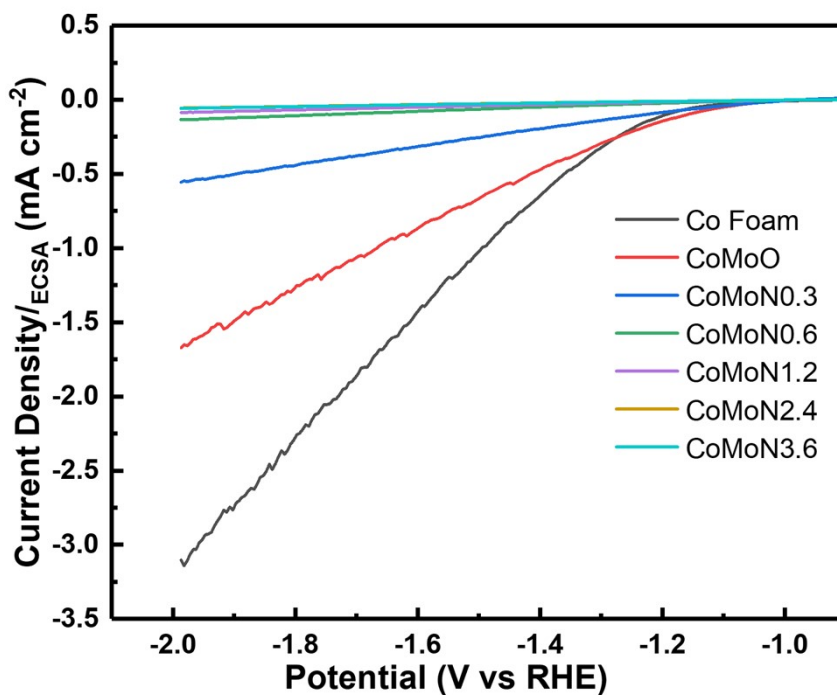

**Figure S8** ECSA normalized LSV curves of the samples for HER,  $ECSA=C_{dl}/C_s(C_s=0.04 \text{ mF cm}^{-2})^1$ , the  $\text{Current Density}/ECSA$ = the current density/ECSA.

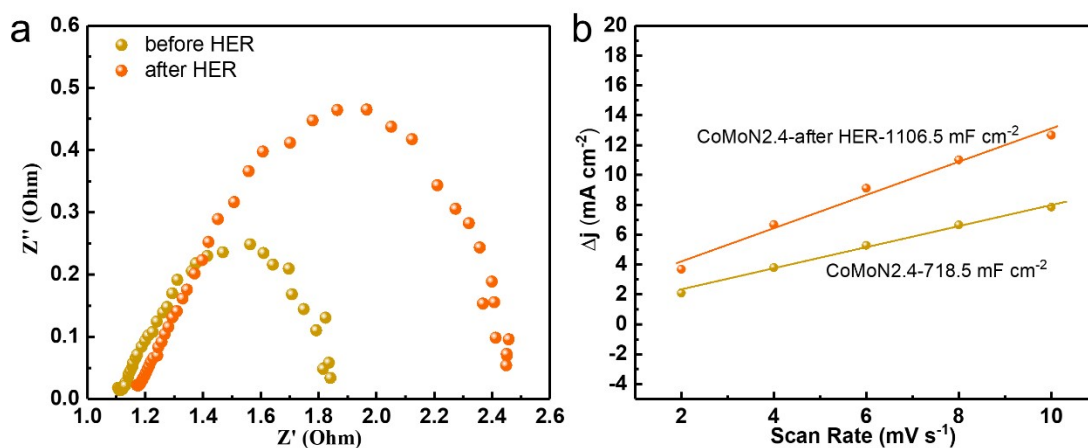

**Figure S9.** The electrochemical impedance spectroscopies (EIS) and electrochemical double-layer capacitance ( $C_{dl}$ ) of the CoMoN2.4 before and after the HER long-term stability test.

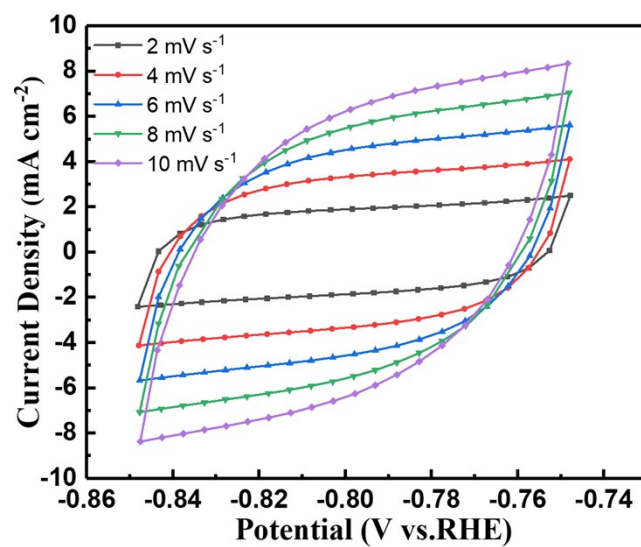

**Figure S10.** CV curves under different scan rates of CoMoN2.4 after HER stability

test

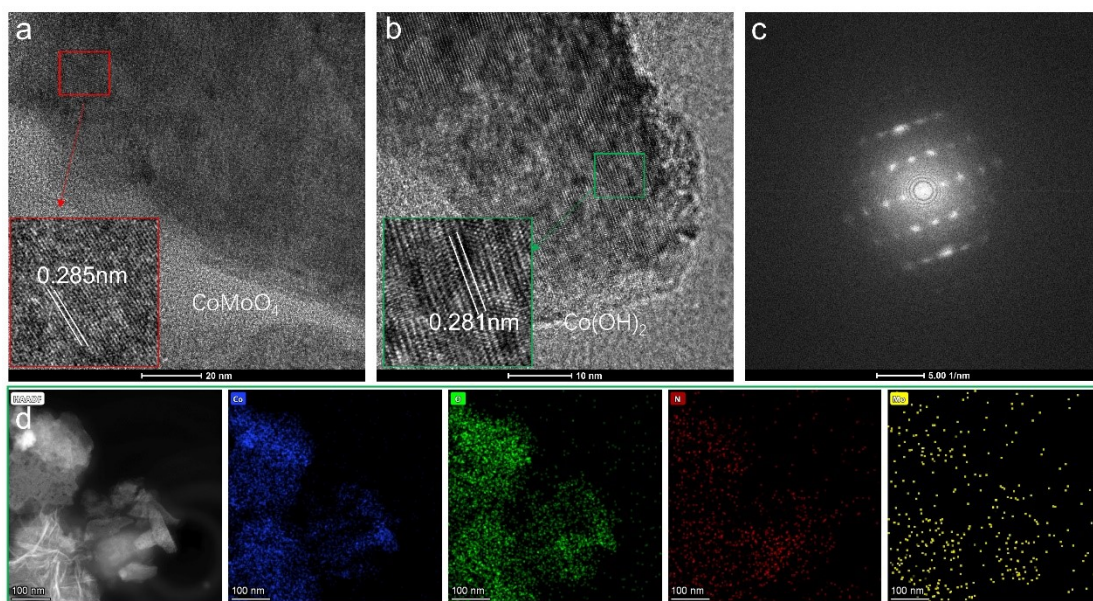

**Figure S11.** HRTEM images (a) and (b), corresponding SAED pattern of b (c), and EDS mappings (d) of CoMoN2.4.

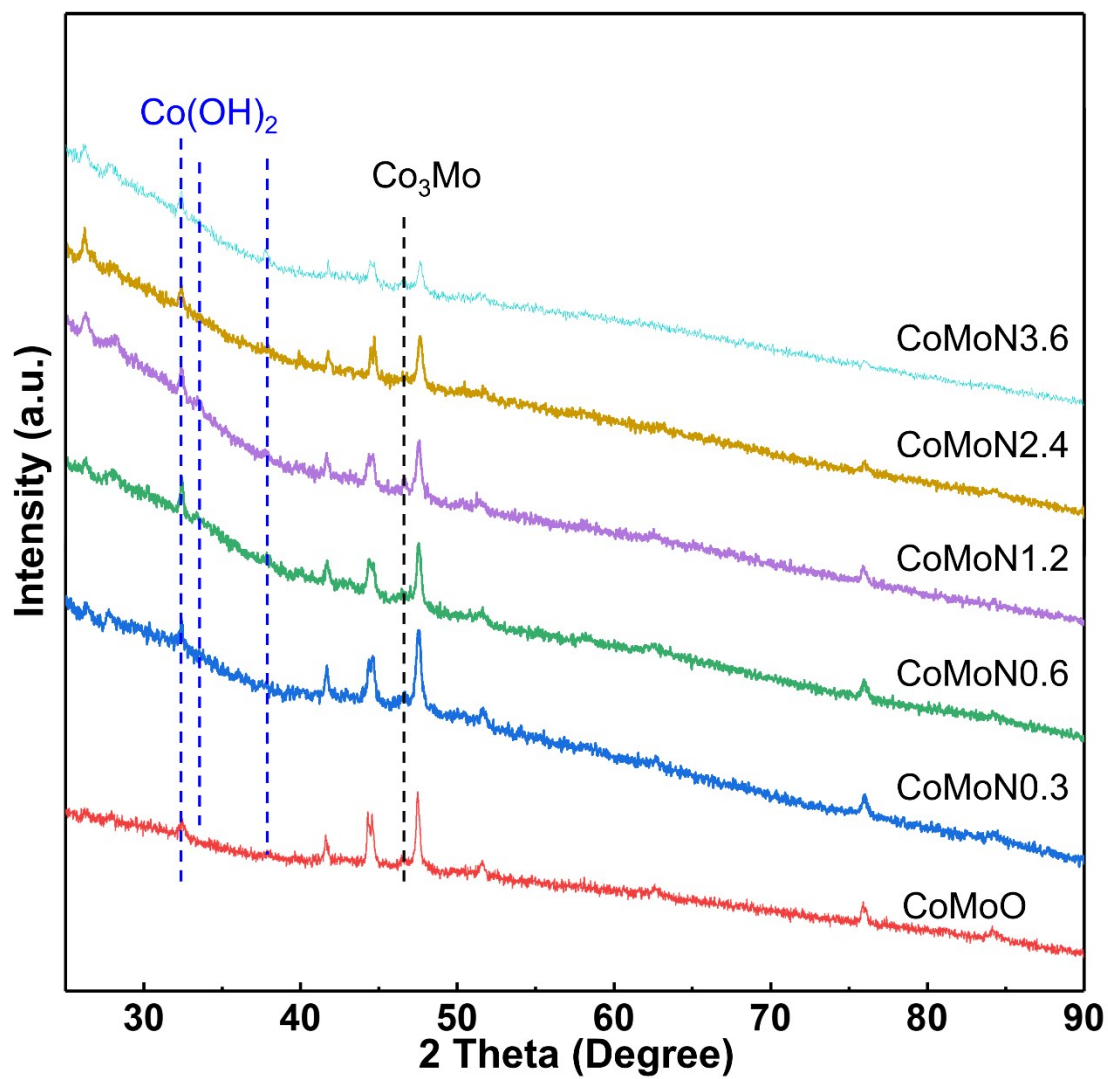

Figure S12. XRD pattern of the samples after a short-time HER test.



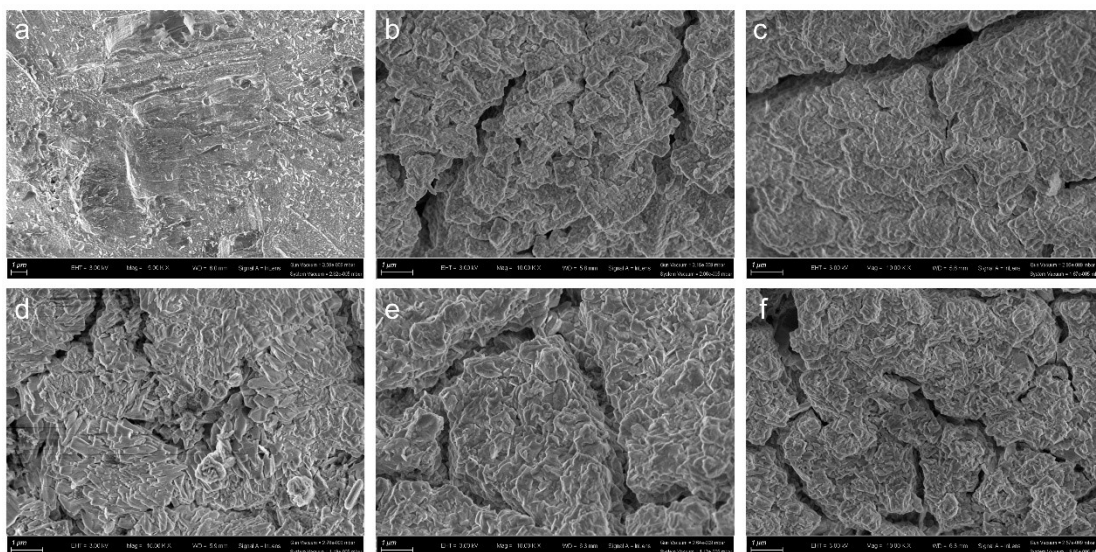

**Figure S13.** SEM of the catalysts after a short-time HER test. (a) CoMoO precursor, (b) CoMoN0.3, (c) CoMoN0.6, (d) CoMoN1.2, (e) CoMoN2.4, (f) CoMoN3.6.

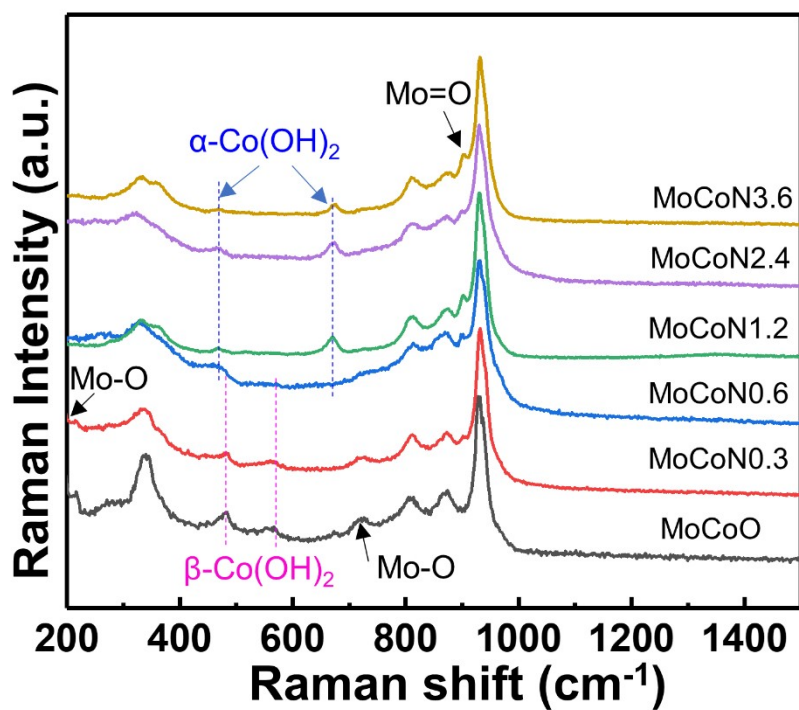

**Figure S14.** Raman spectra of the samples after a short-time HER test.

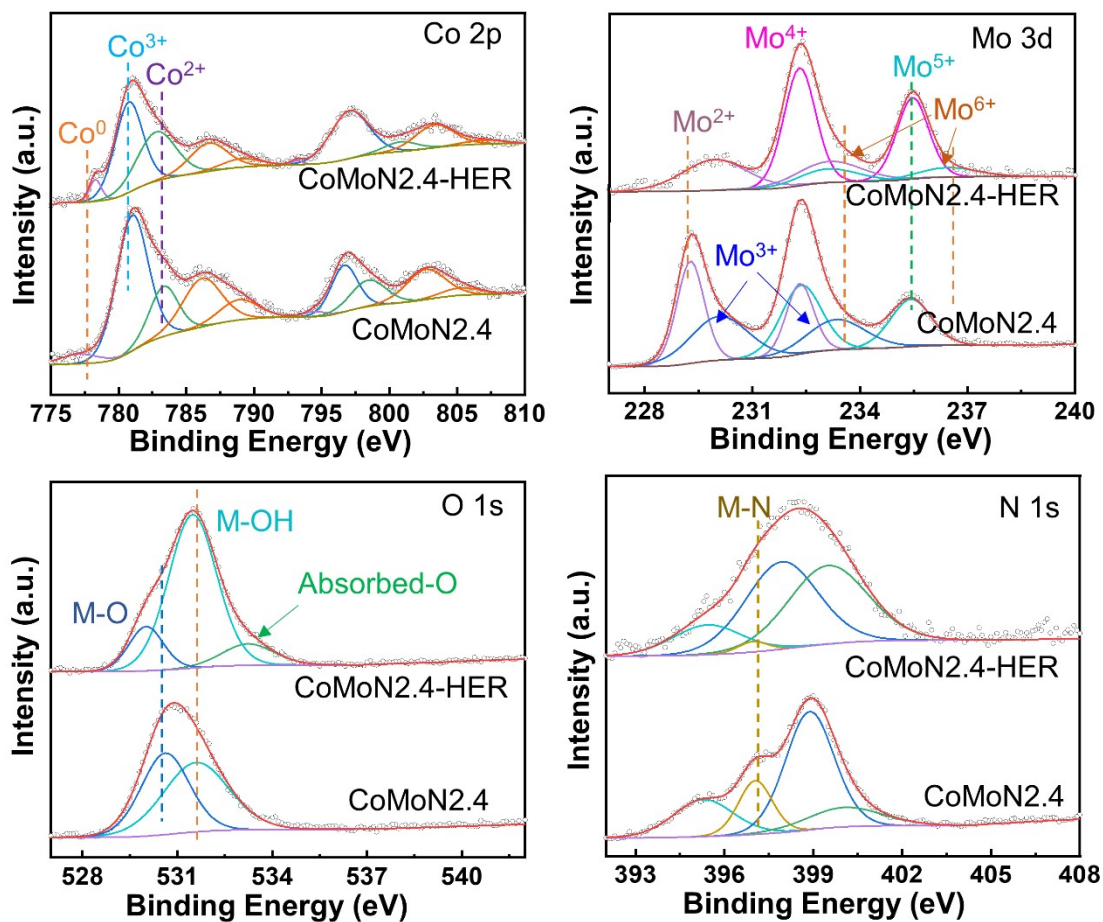

**Figure S15.** High-resolution XPS spectra of Co 2p, Mo 3d, O 1s, and N 1s in CoMoN2.4 before and after HER long-term stability.

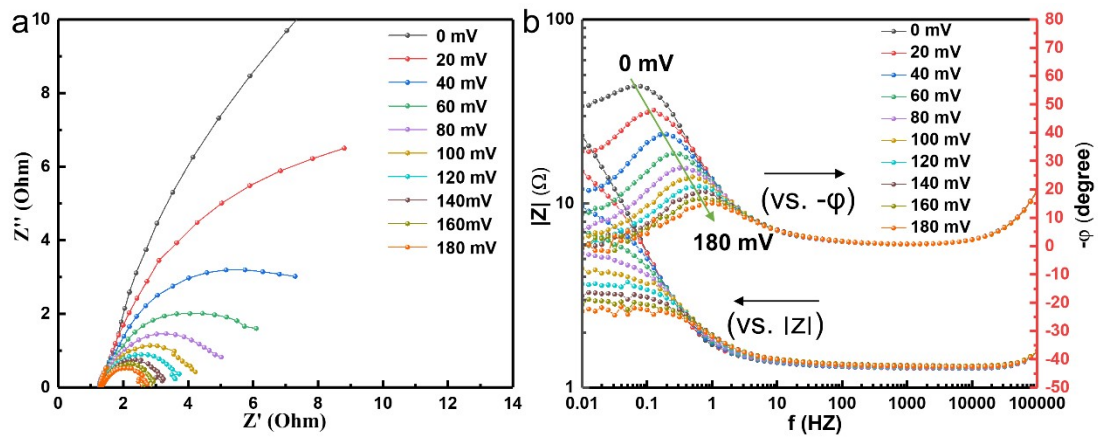

**Figure S16.** The Nyquist (a) and Bode frequency-resistance plots (b) of CoMoN2.4 under different overpotentials.

**Table S1.** The HER performance comparison of the nitrides in 1 M KOH.

Note: NF, CC, CFC, CP, and CF represent Ni Foam, Carbon Cloth, Carbon Fiber Cloth, Carbon Paper, and Co Foam, respectively. Y and NA represent Yes and Not Available.

| Samples                              | Preparation Methods                                  | Overpotential under a certain                                         | Stability under a certain   | IR correction | References |
|--------------------------------------|------------------------------------------------------|-----------------------------------------------------------------------|-----------------------------|---------------|------------|
|                                      |                                                      | current density                                                       | current density             |               |            |
| Ni <sub>3</sub> N <sub>1-x</sub> /NF | N <sub>2</sub> plasma                                | 55 mV, 10 mA cm <sup>-2</sup>                                         | 50h, 50 mA cm <sup>-2</sup> | NA            | 2          |
| Ni <sub>3</sub> N/NF                 | Electrodeposition+<br>Nitridation in NH <sub>3</sub> | 12 mV, 10 mA cm <sup>-2</sup>                                         | 50h, 10 mA cm <sup>-2</sup> | Y             | 3          |
| P,Ce-FeNi <sub>3</sub> N/NF          | Hydrothermal                                         | 153 mV, 100 mA cm <sup>-2</sup><br>21.3 mV, 10 mA cm <sup>-2</sup>    | 50h, 50 mA cm <sup>-2</sup> | Y             | 4          |
| Ni <sub>2</sub> Mo <sub>3</sub> N/NF | Annealed                                             | 89 mV, 50 mA cm <sup>-2</sup><br>123.8 mV, 100 mA cm <sup>-2</sup>    | 24h, 10 mA cm <sup>-2</sup> | Y             | 5          |
| Ni <sub>3</sub> N/NF                 | Oxided+Nitridation in<br>NH <sub>3</sub>             | 171.9 mV, 50 mA cm <sup>-2</sup><br>207.3 mV, 100 mA cm <sup>-2</sup> | 20h, 24 mA cm <sup>-2</sup> | Y             | 6          |

|                                        |                                |                                 |                                  |    |    |
|----------------------------------------|--------------------------------|---------------------------------|----------------------------------|----|----|
| Cr-Co <sub>4</sub> N/CC                | Hydrothermal+                  | 21 mV, 10 mA cm <sup>-2</sup>   | 150h, 10 mA cm <sup>-2</sup>     | NA | 7  |
|                                        | Nitridation in urea            | 99 mV, 100 mA cm <sup>-2</sup>  |                                  |    |    |
| CoN/CC                                 | Hydrothermal+                  | 150mV, 10 mA cm <sup>-2</sup>   | ---                              | NA | 7  |
|                                        | Nitridation in urea            | 330 mV, 100 mA cm <sup>-2</sup> |                                  |    |    |
| NiMoN/NF                               | Hydrothermal+                  | 56mV, 100 mA cm <sup>-2</sup>   | 48h, 100/500 mA cm <sup>-2</sup> | Y  | 8  |
|                                        | Nitridation in NH <sub>3</sub> | 127 mV, 500 mA cm <sup>-2</sup> |                                  |    |    |
| VNiN/CP                                | Hydrothermal+                  | 95 mV, 10 mA cm <sup>-2</sup>   | 12h, 10 mA cm <sup>-2</sup>      | NA | 9  |
|                                        | Nitridation in NH <sub>3</sub> |                                 |                                  |    |    |
| Co-Ni <sub>3</sub> N/NFF               | Hydrothermal+                  | 194 mV, 10 mA cm <sup>-2</sup>  | 24h, 10-50 mA cm <sup>-2</sup>   | NA | 10 |
|                                        | Nitridation in NH <sub>3</sub> |                                 |                                  |    |    |
| Cu <sub>1</sub> Ni <sub>2</sub> -N/CFC | Solvothermal+                  | 71.4 mV, 10 mA cm <sup>-2</sup> | 60h, 10 mA cm <sup>-2</sup>      | NA | 11 |
|                                        | Nitridation in NH <sub>3</sub> |                                 |                                  |    |    |
| W <sub>2</sub> N <sub>3</sub> -powder  | Nitridation in NH <sub>3</sub> | 379 mV, 10 mA cm <sup>-2</sup>  | ---                              | NA | 12 |
| cRu-Ni <sub>3</sub> N/NF               | Hydrothermal+                  | 32 mV, 10 mA cm <sup>-2</sup>   | 100h, 50 mA cm <sup>-2</sup>     | Y  | 13 |
|                                        | Nitridation in NH <sub>3</sub> | 99 mV, 100mA cm <sup>-2</sup>   |                                  |    |    |



|                                        |                                            |                                                                  |                                     |    |           |
|----------------------------------------|--------------------------------------------|------------------------------------------------------------------|-------------------------------------|----|-----------|
| Ni <sub>3</sub> N/NF                   | Hydrothermal+                              | 92 mV, 10 mA cm <sup>-2</sup>                                    | ---                                 | Y  | 13        |
|                                        | Nitridation in NH <sub>3</sub>             | 125 mV, 100mA cm <sup>-2</sup>                                   |                                     |    |           |
| Co-Mo <sub>5</sub> N <sub>6</sub> /NFF | Hydrothermal+                              | 19 mV, 10 mA cm <sup>-2</sup>                                    | 10h, 10/50/1000 mA cm <sup>-2</sup> | Y  | 14        |
|                                        | Nitridation in NH <sub>3</sub>             | 280 mV, 1000 mA cm <sup>-2</sup>                                 |                                     |    |           |
| NiMoN/CC                               | Electrodeposition+N <sub>2</sub><br>plasma | 109 mV, 10 mA cm <sup>-2</sup>                                   | 12h, 10/30/50 mA cm <sup>-2</sup>   | NA | 15        |
| Ni-Ni <sub>3</sub> N/CC                | Hydrothermal+N <sub>2</sub><br>plasma      | 150 mV, 10 mA cm <sup>-2</sup>                                   | 15h, 100 mA cm <sup>-2</sup>        | Y  | 16        |
| CoMoN <sub>0.3</sub> /CF               | Hydrothermal+                              | 74mV, 10 mA cm <sup>-2</sup>                                     | ---                                 | NA | This work |
|                                        | Nitridation in urea                        | 231mV, 100 mA cm <sup>-2</sup><br>678mV, 500 mA cm <sup>-2</sup> |                                     |    |           |
| CoMoN <sub>0.6</sub> /CF               | Hydrothermal+                              | 51mV, 10 mA cm <sup>-2</sup>                                     | ---                                 | NA | This work |
|                                        | Nitridation in urea                        | 194mV, 100 mA cm <sup>-2</sup><br>616mV, 500 mA cm <sup>-2</sup> |                                     |    |           |
| CoMoN <sub>1.2</sub> /CF               | Hydrothermal+                              | 42mV, 10 mA cm <sup>-2</sup>                                     | ---                                 | NA | This work |

---

|                          |                     |                                |                                  |    |           |
|--------------------------|---------------------|--------------------------------|----------------------------------|----|-----------|
|                          | Nitridation in urea | 180mV, 100 mA cm <sup>-2</sup> |                                  |    |           |
|                          |                     | 595mV, 500 mA cm <sup>-2</sup> |                                  |    |           |
|                          |                     | 37mV, 10 mA cm <sup>-2</sup>   |                                  |    |           |
| CoMoN <sub>2.4</sub> /CF | Hydrothermal+       | 164mV, 100 mA cm <sup>-2</sup> | 110h, 10-600 mA cm <sup>-2</sup> | NA | This work |
|                          | Nitridation in urea | 578mV, 500 mA cm <sup>-2</sup> |                                  |    |           |
|                          |                     | 35mV, 10 mA cm <sup>-2</sup>   |                                  |    |           |
| CoMoN <sub>3.6</sub> /CF | Hydrothermal+       | 164mV, 100 mA cm <sup>-2</sup> | ---                              | NA | This work |
|                          | Nitridation in urea | 585mV, 500 mA cm <sup>-2</sup> |                                  |    |           |

---

## References:

1. P. Zhou; P. Niu; J. Liu; N. Zhang; H. Bai; M. Chen; J. Feng; D. Liu; L. Wang; S. Chen; C. T. Kwok; Y. Tang; R. Li; S. Wang; H. Pan, *Adv. Funct. Mater.*, 2022, **32**, 2202068.
2. Bin Liu; Bin He; Hui-Qing Peng; Yufei Zhao; unye Cheng; Jing Xia; Jianhua Shen; Tsz-Wai Ng; Xiangmin Meng; Chun-Sing Lee; W. Zhang, *Adv. Sci. (Weinh)*, 2018, **5**, 1800406.
3. Fuzhan Song; Wei Li; Jiaqi Yang; Guanqun Han; Peilin Liao; Y. Sun., *Nat. Commun.*, 2018, **9**, 4531.
4. Shuangshuang Li; Yunmei Du; Mengmeng Wang; Jie Liu; Bin Li; Yuanxiang Gu; L. Wang., *Sci. China Mater.*, 2023, **66**, 4639-4649.
5. Sang Heon Park; a. M. H. L. Tae Hwan Jo; Kenta Kawashima; C. Buddie Mullins; Hyung-Kyu Lim; D. H. Youn., *J. Mater. Chem. A*, 2021, **9**, 4945.
6. Chikaodili E. Chukwunke; Kenta Kawashima; Hao Li; Raul A. Marquez; Yoon Jun Son; Lettie A. Smith; Hugo Celio; Graeme Henkelman; C. B. Mullins., *J. Mater. Chem. A*, 2024, **12**, 1654.
7. N. Yao; P. Li; Z. Zhou; Y. Zhao; G. Cheng; S. Chen; W. Luo, *Adv. Energy Mater.*, 2019, **9**, 1902449.
8. L. Yu; Q. Zhu; S. Song; B. McElhenny; D. Wang; C. Wu; Z. Qin; J. Bao; Y. Yu; S. Chen; Z. Ren, *Nat. Commun.*, 2019, **10**, 5106.
9. R. Tong; Z. Sun; F. Zhang; X. Wang; J. Xu; X. Shi; S. Wang; H. Pan, *ACS Sustainable Chem. Eng.*, 2018, **6**, 16525-16531.
10. C. Zhu; A. L. Wang; W. Xiao; D. Chao; X. Zhang; N. H. Tiep; S. Chen; J. Kang; X. Wang; J. Ding; J. Wang; H. Zhang; H. J. Fan, *Adv. Mater.*, 2018, **30**, e1705516.
11. Zhaoyang Wang; Lin Xu; Fuzhi Huang; Longbing Qu; Jiantao Li; Kwadwo Asare Owusu; Ziang Liu; Zifeng Lin; Binhua Xiang; Xiong Liu; Kangning Zhao; Xiaobin Liao; Wei Yang; Yi-Bing Cheng; L. Mai, *Adv. Energy Mater.*, 2019, **9**, 1900390.
12. R. Tong; Y. Qu; Q. Zhu; X. Wang; Y. Lu; S. Wang; H. Pan, *ACS Appl. Energy Mater.*, 2019, **3**, 1082-1088.
13. J. Zhu; R. Lu; W. Shi; L. Gong; D. Chen; P. Wang; L. Chen; J. Wu; S. Mu; Y. Zhao, *Energy Environ. Mater.*, 2023, **6**, e12318.

14. F. Lin; Z. Dong; Y. Yao; L. Yang; F. Fang; L. Jiao, *Adv. Energy Mater.*, 2020, **10**, 2002176.
15. Y. Zhang; B. Ouyang; J. Xu; S. Chen; R. S. Rawat; H. J. Fan, *Adv. Energy Mater.*, 2016, **6**, 1600221.
16. Xi Wang; Fengyu Qiao; Chao Sun; Jipeng Zhu; Bo Ouyang; E. Kan., *J. Electron. Mater.*, 2023, **52**, 1740-1748.
